# Supplementary material for: High-strength, thermosensitive double network hydrogels with antibacterial functionality
Source: Royal Society of Chemistry journal article supplement (doi:10.1039/d1sm00689d), 2021-01-01
Supplement: d1sm00689d1.pdf [file d1sm00689d1.pdf]

## Supporting Information

### High-strength, thermosensitive double network hydrogels with antibacterial functionality

Received 9th May 2021,  
Accepted xthMay 2021

DOI: 10.1039/x0xx00000x

Xuefeng Li,<sup>\*ab</sup> Yonglin Wang,<sup>a</sup> Dapeng Li,<sup>\*c</sup> Mengmeng Shu,<sup>a</sup> lingli Shang,<sup>a</sup> Min Xia,<sup>d</sup> Yiwan Huang<sup>ab</sup>

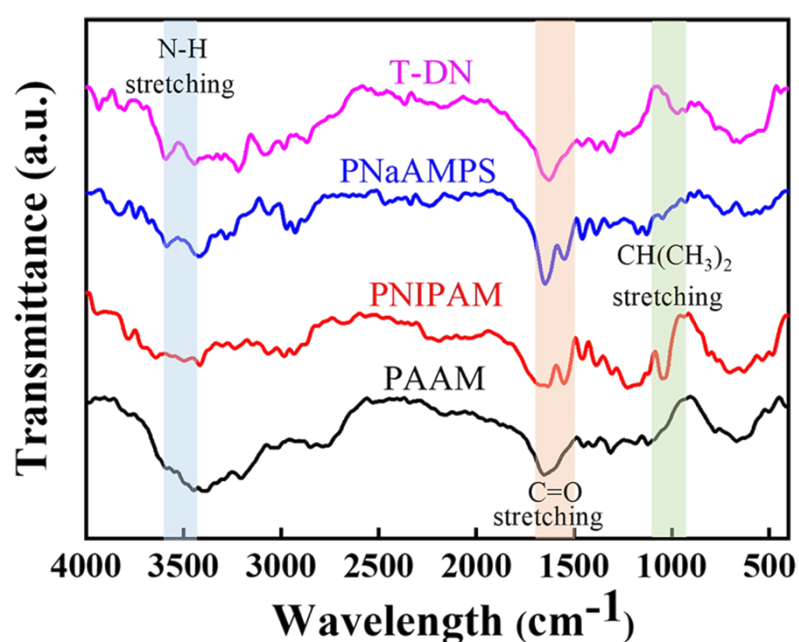

**Figure S1.** FTIR spectra of PNaAMPS, PNIPAM, PAAM, and T-DN hydrogels.

*a.* Hubei Provincial Key Laboratory of Green Materials for Light Industry, Hubei University of Technology, Wuhan 430068, China. E-mail: li\_xf@mail.hbut.edu.cn  
*b.* Collaborative Innovation Centre of Green Light-weight Materials and Processing, Hubei University of Technology, Wuhan 430068, China.  
*c.* Bioengineering Department, College of Engineering, University of Massachusetts Dartmouth, North Dartmouth, MA 02747-2300, USA. E-mail: dli@umassd.edu  
*d.* Beijing Institute of Technology, School of Materials Science & Engineering, Beijing 100081, China

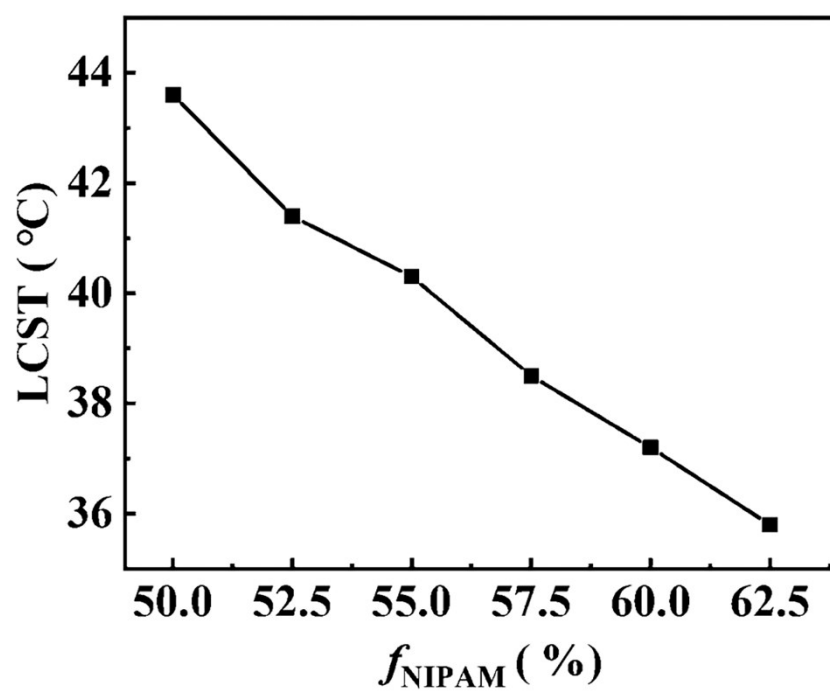

Figure S2. Effect of NIPAM content on LCST of T-DN hydrogel.

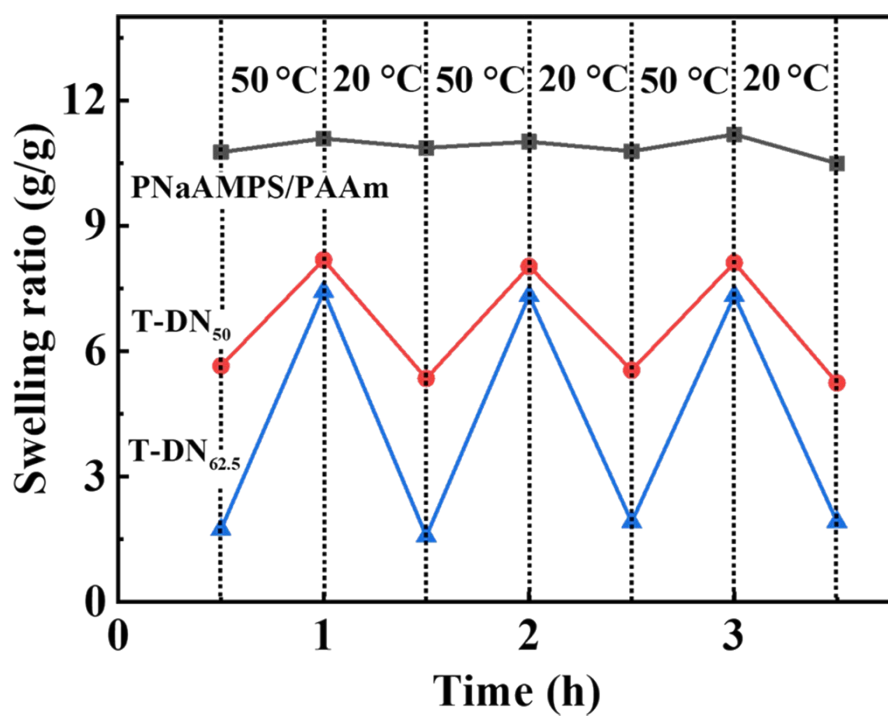

**Figure S3.** Oscillating swelling-deswelling kinetics of T-DN hydrogels in response to cyclic environmental temperature change in the 20~50 °C range in DI water.
